# Supplementary material for: Biostimulating Gut Microbiome with Bilberry Anthocyanin Combo to Enhance Anti-PD-L1 Efficiency against Murine Colon Cancer
Source: PubMed Central journal article supplement (PMC7074734; doi:10.3390/microorganisms8020175), 2020-01-25
Supplement: microorganisms-08-00175-s001.pdf [file microorganisms-08-00175-s001.pdf]

## Supporting Information

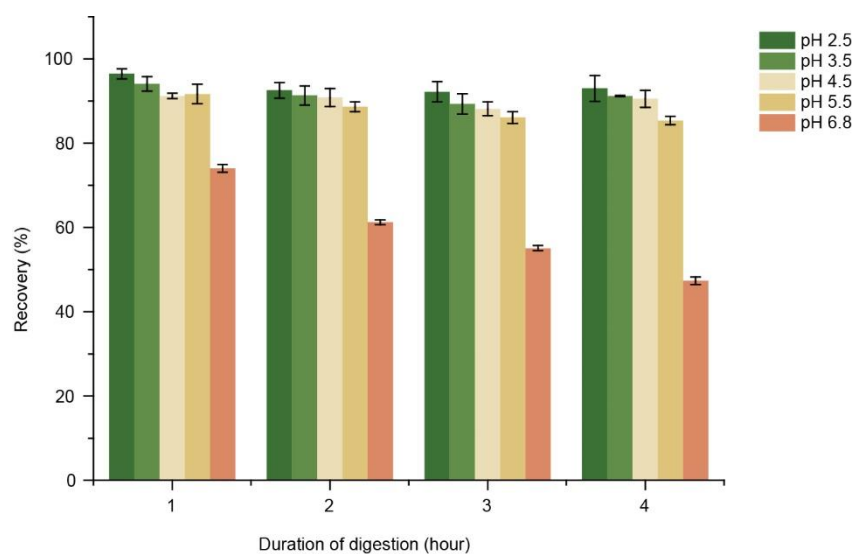

Figure S1. Total anthocyanin content during incubation at different pHs.

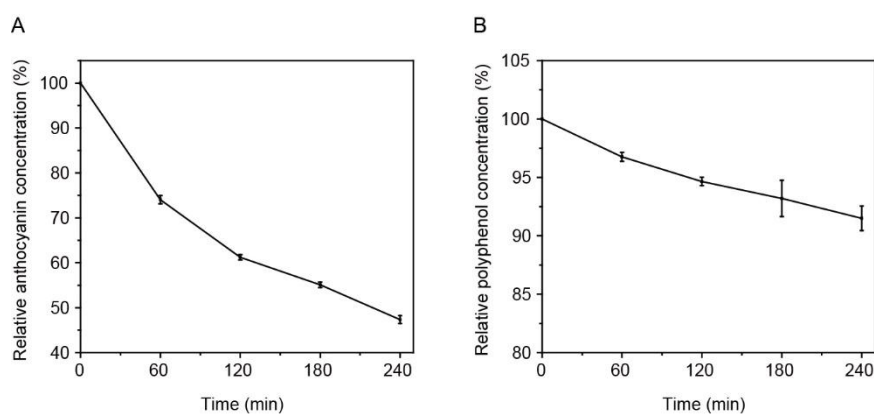

Figure S2. Stability of bilberry anthocyanins in simulated intestinal fluid without pancreatin at pH 6.8 for 4 h. Total anthocyanin (A) and polyphenol (B) content during incubation.

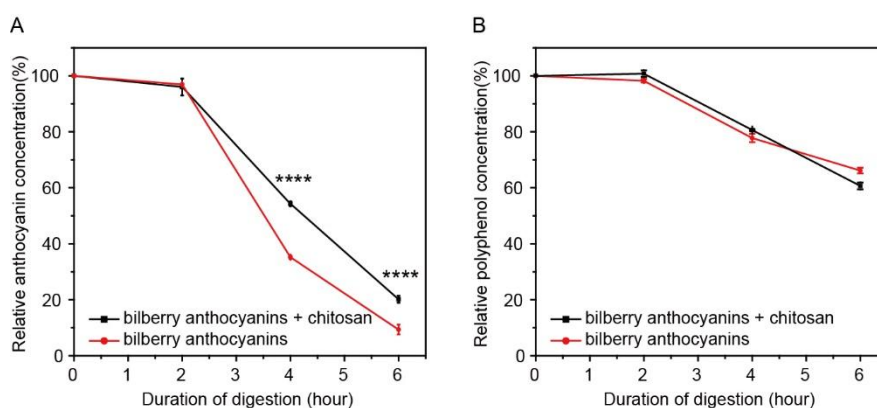

Figure. S3. Relative content of anthocyanins (A) and polyphenols (B) of bilberry anthocyanins and anthocyanin-chitosan in simulated gastric fluid with pepsin at pH 2.0 for 2 h and subsequently in simulated intestinal fluid (SIF) with pancreatin at pH 7.5 for 4 h. The concentrations of chitosan and bilberry extracts were 1 mg/mL and 0.5 mg/mL, respectively.

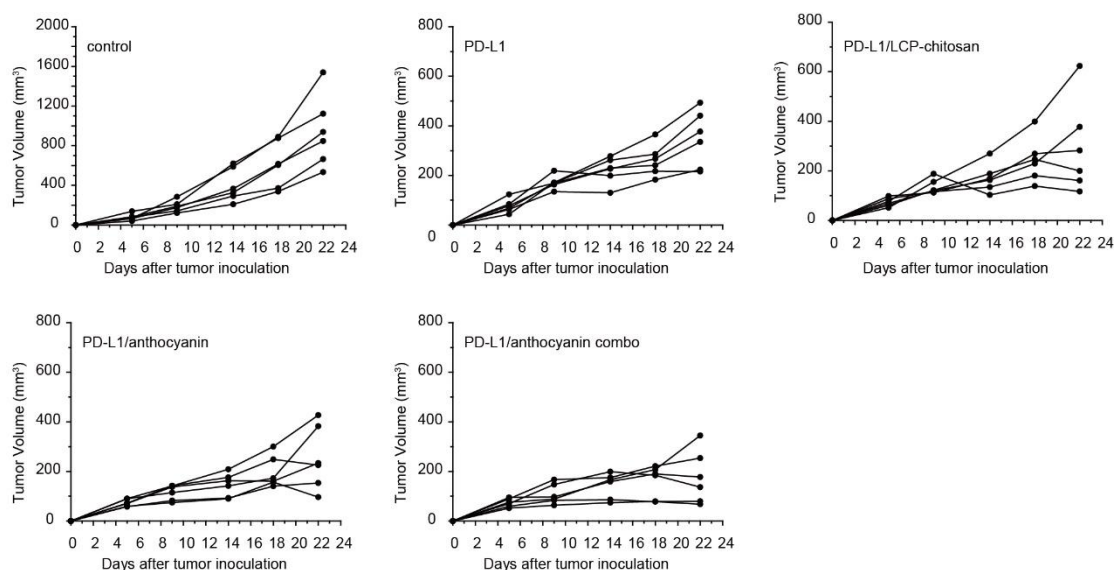

Figure S4. Individual tumor size growth data for MC38 tumor-bearing mice in each group.

Table S1. Total polyphenol and anthocyanin content before and after incubation in simulated gastric fluid without pepsin (pH 1.2).

| Time (min) | Total anthocyanin recovery (%) | Total polyphenol recovery (%) |
|------------|--------------------------------|-------------------------------|
| 0          | 100                            | 100                           |
| 60         | 104.46±0.36                    | 99.94±0.81                    |
| 120        | 103.08±1.03                    | 100.89±1.40                   |

Table S2. Adonis variance analysis based on Bray–Curtis distance matrices at OTU level.

| Group     | R <sup>2</sup> | P-value |
|-----------|----------------|---------|
| CT vs. PD | 0.27571        | 0.033   |
| PD vs. BA | 0.28997        | 0.027   |
| PD vs. PE | 0.29733        | 0.020   |
| PD vs. BP | 0.30182        | 0.030   |
| PE vs. BP | 0.40326        | 0.031   |
